# Supplementary material for: Mapping the Effects of Music Exposure on Adult Brain Activity: A Scoping Review
Source: Research Square preprint supplement (doi:10.21203/rs.3.rs-7512534/v1), 2025-10-10
Supplement: Supplementary file 1 [file cc40cbd28e2fdcd3e86553af.docx]

| **Item** | **Description** | **Reported?** | **Location in Manuscript** |
| --- | --- | --- | --- |
| 1. Title | Identify the report as a scoping review | Yes | Title |
| 2. Abstract | Structured summary including background, objectives, methods, results, and conclusions | Yes | Abstract |
| 3. Rationale | Explain the rationale for the review | Yes | Introduction |
| 4. Objectives | Clearly state the objectives and/or questions | Yes | Introduction |
| 5. Protocol and registration | Indicate if a review protocol exists and where it can be accessed | No | Not stated |
| 6. Eligibility criteria | Specify inclusion and exclusion criteria and rationale | Yes | Methods |
| 7. Information sources | List all sources of information with coverage dates | Yes | Methods |
| 8. Search | Present full search strategy for at least one database | Yes | Methods |
| 9. Selection of sources | Describe process for selecting sources of evidence | Yes | Methods |
| 10. Data charting process | Describe methods of data extraction/charting | Yes | Methods |
| 11. Data items | List and define all data items collected | Yes | Methods |
| 12. Critical appraisal (optional) | If done, provide rationale and methods | No | Not conducted |
| 13. Synthesis of results | Describe how results were synthesized | Yes | Methods |
| 14. Selection of sources results | Provide numbers of sources screened and included, with a flow diagram | Yes | Results |
| 15. Characteristics of sources | Present characteristics of included sources | Yes | Table 1 |
| 16. Critical appraisal within sources (optional) | Present results of any critical appraisal | No | Not conducted |
| 17. Results of individual sources | Present relevant data from individual sources | Yes | Results / Table 1 |
| 18. Synthesis of results | Summarize overall findings aligned with objectives | Yes | Results / Discussion |
| 19. Summary of evidence | Summarize key findings and their relevance | Yes | Discussion |
| 20. Limitations | Discuss limitations of the review process | Yes | Limitations |
| 21. Conclusions | Provide general interpretation and implications | Yes | Conclusions |
| 22. Funding | Describe sources of funding and roles | Yes | Conflicts of interest and Funding |
